# Supplementary material
Source: PubMed Central journal article supplement (PMC9082972)
Supplement: sj-pdf-1-jag-10.1177_07334648221081850.pdf [file sj-pdf-1-jag-10.1177_07334648221081850.pdf]

**Table S1: Consolidated criteria for Reporting Qualitative research (COREQ) Checklist**

| No. Item                                       | Guide questions/description                                                                                                               | Answers                                                                                                                                                                                                                        | page |
|------------------------------------------------|-------------------------------------------------------------------------------------------------------------------------------------------|--------------------------------------------------------------------------------------------------------------------------------------------------------------------------------------------------------------------------------|------|
| <b>Domain 1: Research team and reflexivity</b> |                                                                                                                                           |                                                                                                                                                                                                                                |      |
| <i>Personal Characteristics</i>                |                                                                                                                                           |                                                                                                                                                                                                                                |      |
| 1. Interviewer/facilitator                     | Which author/s conducted the interview or focus group?                                                                                    | CC; VS                                                                                                                                                                                                                         | 2    |
| 2. Credentials                                 | What were the researcher's credentials? E.g. PhD, MD                                                                                      | CC is an RN, GNC(c), PhD; VS is a PhD                                                                                                                                                                                          | 7    |
| 3. Occupation                                  | What was their occupation at the time of the study?                                                                                       | Both PIs are professors at Ontario universities.                                                                                                                                                                               | 7    |
| 4. Gender                                      | Was the researcher male or female?                                                                                                        | Both PIs are female.                                                                                                                                                                                                           | 7    |
| 5. Experience and training                     | What experience or training did the researcher have?                                                                                      | Both PIs are well versed in qualitative research and have published papers using qualitative methods.                                                                                                                          | 7    |
| <i>Relationship with participants</i>          |                                                                                                                                           |                                                                                                                                                                                                                                |      |
| 6. Relationship established                    | Was a relationship established prior to study commencement?                                                                               | No. Some participants may have been familiar with the PIs' work due to advocacy efforts. The PIs did not establish personal relationships with the participants.                                                               | 2    |
| 7. Participant knowledge of the interviewer    | What did the participants know about the researcher? e.g. personal goals, reasons for doing the research                                  | CC is a researcher focused on improving the care of older adults in LTC and VS is a prominent advocate for and researcher of LTCH families. Both have in-depth knowledge about LTCH care (e.g. CC conducted her PhD in LTCHs). | 7    |
| 8. Interviewer characteristics                 | What characteristics were reported about the interviewer/facilitator? e.g. Bias, assumptions, reasons and interests in the research topic | Both interviewers, CC and VS, have expertise in qualitative methods by background and training.                                                                                                                                | 7    |
| <b>Domain 2: study design</b>                  |                                                                                                                                           |                                                                                                                                                                                                                                |      |
| <i>Theoretical framework</i>                   |                                                                                                                                           |                                                                                                                                                                                                                                |      |
| 9. Methodological                              | What methodological orientation was                                                                                                       | Thematic analysis.                                                                                                                                                                                                             | 2-3  |

|                                  |                                                                                                                      |                                                                                                                                                                                                                                                                                                                                                                 |               |
|----------------------------------|----------------------------------------------------------------------------------------------------------------------|-----------------------------------------------------------------------------------------------------------------------------------------------------------------------------------------------------------------------------------------------------------------------------------------------------------------------------------------------------------------|---------------|
| orientation and Theory           | stated to underpin the study? e.g. grounded theory, discourse analysis, ethnography, phenomenology, content analysis |                                                                                                                                                                                                                                                                                                                                                                 |               |
| <i>Participant selection</i>     |                                                                                                                      |                                                                                                                                                                                                                                                                                                                                                                 |               |
| 10. Sampling                     | How were participants selected? e.g. purposive, convenience, consecutive, snowball                                   | Purposive sampling, with the intent to recruit more male caregivers to have equal numbers of males and females, but we were not able to.                                                                                                                                                                                                                        | 2             |
| 11. Method of approach           | How were participants approached? e.g. face-to-face, telephone, mail, email                                          | Social media (i.e., Twitter) was used to recruit participants. Interested participants emailed the PIs and communication occurred via email.                                                                                                                                                                                                                    | 2             |
| 12. Sample size                  | How many participants were in the study?                                                                             | 30                                                                                                                                                                                                                                                                                                                                                              | 3             |
| 13. Non-participation            | How many people refused to participate or dropped out? Reasons?                                                      | 0                                                                                                                                                                                                                                                                                                                                                               | 3             |
| <i>Setting</i>                   |                                                                                                                      |                                                                                                                                                                                                                                                                                                                                                                 |               |
| 14. Setting of data collection   | Where was the data collected? e.g. home, clinic, workplace                                                           | Virtually over Zoom, a video conferencing platform.                                                                                                                                                                                                                                                                                                             | 2             |
| 15. Presence of non-participants | Was anyone else present besides the participants and researchers?                                                    | No.                                                                                                                                                                                                                                                                                                                                                             | 2             |
| 16. Description of sample        | What are the important characteristics of the sample? e.g. demographic data, date                                    | All were family caregivers of a loved one living in LTCH and were unable to visit for extended periods of time during the COVID-19 pandemic. These family members considered themselves “essential caregivers” and provided emotional support and companionship for their loved ones. Characteristics of the EFCs and their loved ones are provided in a table. | 2 and table 1 |
| <i>Data collection</i>           |                                                                                                                      |                                                                                                                                                                                                                                                                                                                                                                 |               |
| 17. Interview guide              | Were questions, prompts, guides provided by the authors? Was it pilot tested?                                        | Yes, a pilot-tested, semi-structured interview guide was used.                                                                                                                                                                                                                                                                                                  | 2             |
| 18. Repeat interviews            | Were repeat interviews carried out? If yes, how many?                                                                | No.                                                                                                                                                                                                                                                                                                                                                             | 3             |
| 19. Audio/visual recording       | Did the researcher use audio or visual recording to collect the data?                                                | Video recording.                                                                                                                                                                                                                                                                                                                                                | 2             |

|                                        |                                                                                                                                 |                                                                                                                                                          |          |
|----------------------------------------|---------------------------------------------------------------------------------------------------------------------------------|----------------------------------------------------------------------------------------------------------------------------------------------------------|----------|
| 20. Field notes                        | Were field notes made during and/or after the interview or focus group?                                                         | Yes, field notes were made. The PIs discussed them after each focus group. These also served to inform the initial generation of the codes.              | 2-3      |
| 21. Duration                           | What was the duration of the interviews or focus group?                                                                         | 90 minutes for each focus group.                                                                                                                         | 2        |
| 22. Data saturation                    | Was data saturation discussed?                                                                                                  | Yes.                                                                                                                                                     | 2        |
| 23. Transcripts returned               | Were transcripts returned to participants for comment and/or correction?                                                        | No.                                                                                                                                                      | N/A      |
| <b>Domain 3: analysis and findings</b> |                                                                                                                                 |                                                                                                                                                          |          |
| <i>Data analysis</i>                   |                                                                                                                                 |                                                                                                                                                          |          |
| 24. Number of data coders              | How many data coders coded the data?                                                                                            | Three; AY coded all the transcripts and the coding dictionary was checked by the PIs (CC and VS), to refine the codes and the development of the themes. | 3        |
| 25. Description of the coding tree     | Did authors provide a description of the coding tree?                                                                           | Yes.                                                                                                                                                     | Figure 1 |
| 26. Derivation of themes               | Were themes identified in advance or derived from the data?                                                                     | Inductive; themes were derived from the data.                                                                                                            | 2-3      |
| 27. Software                           | What software, if applicable, was used to manage the data?                                                                      | NVivo 12 software.                                                                                                                                       | 3        |
| 28. Participant checking               | Did participants provide feedback on the findings?                                                                              | No.                                                                                                                                                      | N/A      |
| <i>Reporting</i>                       |                                                                                                                                 |                                                                                                                                                          |          |
| 29. Quotations presented               | Were participant quotations presented to illustrate the themes/findings? Was each quotation identified? e.g. participant number | Yes, quotes were used. Alongside the quotes, are the anonymized name or number and the focus group number that the participant was in.                   | 4-6      |
| 30. Data and findings consistent       | Was there consistency between the data presented and the findings?                                                              | Yes.                                                                                                                                                     | 4-6      |
| 31. Clarity of major themes            | Were major themes clearly presented in the findings?                                                                            | Yes.                                                                                                                                                     | 4-6      |

**Chu, Yee, Stamatopoulos**

|                             |                                                                        |      |     |
|-----------------------------|------------------------------------------------------------------------|------|-----|
| 32. Clarity of minor themes | Is there a description of diverse cases or discussion of minor themes? | Yes. | 4-6 |
|-----------------------------|------------------------------------------------------------------------|------|-----|

Developed from: Tong A, Sainsbury P, Craig J. Consolidated criteria for reporting qualitative research (COREQ): a 32-item checklist for interviews and focus groups. *International Journal for Quality in Health Care*. 2007; 19, 349 – 357.
